# Supplementary material for: Severe Intrahepatic Cholestasis of Pregnancy—Potential Mechanism by Which Fetuses Are Protected from the Hazardous Effect of Bile Acids
Source: MDPI journal article supplement (doi:10.3390/jcm12020616), 2023-01-12
Supplement: s1 [file s1]

**Supplementary Table S1.** A comparison of neonatal outcome in singleton and twin pregnancies.

|                                                         | Singleton (n=13)       | Twins (n=10)           | P value |
|---------------------------------------------------------|------------------------|------------------------|---------|
| Gestational age at delivery<br>(median (weeks), 95% CI) | 36.2<br>(34.6-37)      | 35.8<br>(33-37.1)      | 0.86    |
| Birth weight percentile<br>(median, %95 CI)             | 51<br>(36-75)          | 74.5<br>(31-88)        | 0.17    |
| Maternal TBA<br>( $\mu$ mol/L , median, %95 CI)         | 72.25<br>(40.58-129.8) | 61.91<br>(51.55-77.74) | 0.36    |
| TBA in umbilical vein<br>( $\mu$ mol/L, median, %95 CI) | 24.52<br>(16.79-32.78) | 17.11<br>(13.45-23.89) | 0.057   |
| bile acid decrease<br>( %,median, 95% CI)               | 67.64<br>(48.72-78.96) | 70.83<br>(66.09-77.76) | 0.48    |
| Meconium (%)                                            | 46.15                  | 20                     | 0.086   |

**Supplementary Table S2.** Prediction of meconium stained amniotic fluid.

|                              | OR (Meconium) | 95% CI          |
|------------------------------|---------------|-----------------|
| Singleton / twins[Twin]      | 0.1084        | 0.04 to 1.197   |
| Gestational week at delivery | 0.7413        | 0.3453 to 1.449 |
| Birth weight percentile      | 1.015         | 0.9692 to 1.069 |
| TBA maternal at delivery     | 1.003         | 0.9631 to 1.046 |
| TBA level in umbilical vein  | 0.9922        | 0.8623 to 1.135 |
